# Supplementary material for: Crystallographic orientation-dependent anisotropic doping in organic single-crystal microplates
Source: Royal Society of Chemistry journal article supplement (doi:10.1039/d5tc02885j), 2026-01-01
Supplement: d5tc02885j1.pdf [file d5tc02885j1.pdf]

Supplementary Information (SI) for Journal of Materials Chemistry C.  
This journal is © The Royal Society of Chemistry 2025

## **Crystallographic Orientation-dependent Anisotropic Doping in Organic Single-Crystal Microplates**

Mingming Su<sup>a</sup>, Zheng Ren<sup>b</sup>, Tingyi Yan<sup>b</sup>, Yuxin Cheng<sup>c</sup>, Ruofei Jia<sup>b</sup>, Guangpeng Zhu<sup>a</sup>, Jinwen Wang<sup>\*b</sup>, Xiujuan Zhang<sup>\*b</sup>, Jiansheng Jie<sup>\*a,b</sup>

<sup>a</sup>Macao Institute of Materials Science and Engineering, MUST-SUDA Joint Research Center for Advanced Functional Materials, Macau University of Science and Technology, Taipa, 999078 P, R. China

<sup>b</sup>State Key Laboratory of Bioinspired Interfacial Materials Science, Institute of Functional Nano & Soft Materials (FUNSOM), Soochow University, Suzhou 215123, China

<sup>c</sup>College of Chemistry, Chemical Engineering and Materials Science, Soochow University, Suzhou 215123, China

\*Corresponding Authors: Jinwen Wang (jwwang1991@suda.edu.cn); Xiujuan Zhang (xjzhang@suda.edu.cn); Jiansheng Jie (jsjie@suda.edu.cn)

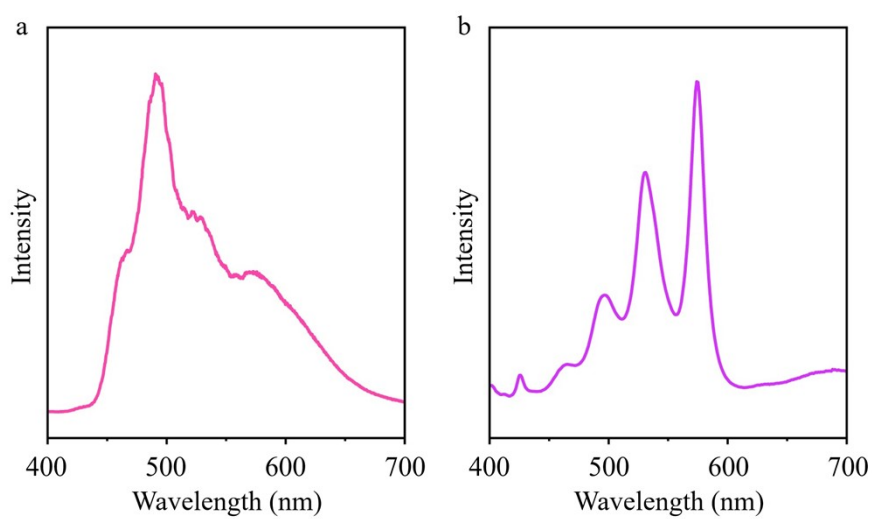

**Fig. S1** (a) The fluorescence spectrum of p-MSB single crystals. (b) The absorption spectrum of Pen molecules.

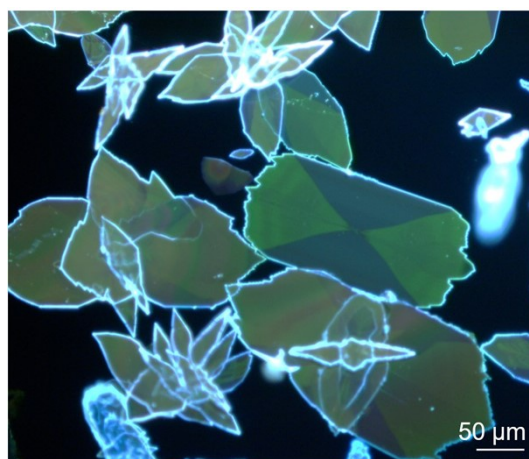

**Fig. S2** The emission patterns of OSSCs obtained from the solution with the mass ratios of 5:1 at room temperature.

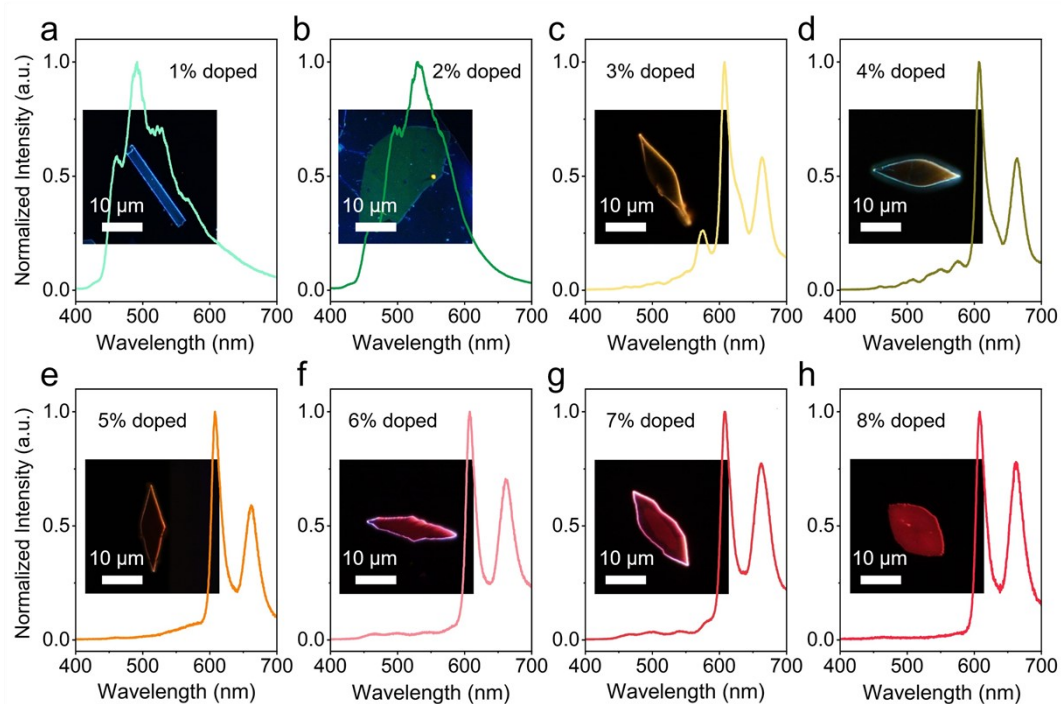

**Fig. S3** Pentacene doped p-MSB single crystals with controlled pentacene doping concentration via physical vapor deposition. PL spectra of pentacene-doped p-MSB crystals with different doping concentration. Illustration: Top-view photographs under UV-light irradiation of crystals with a doping concentration of 1% to 8%.

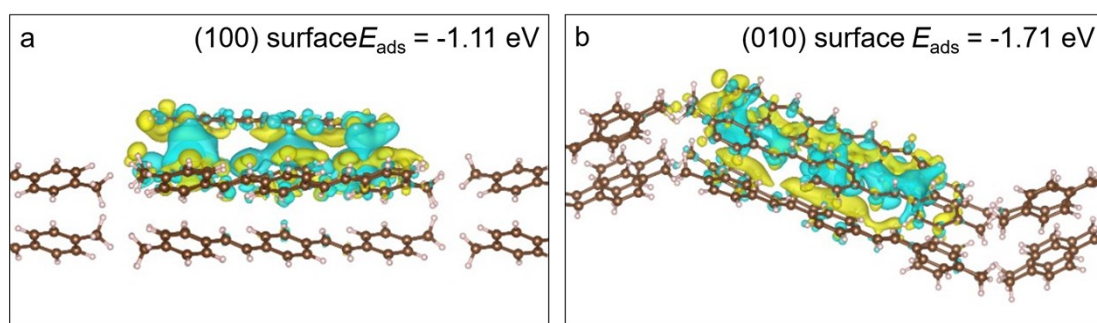

**Fig. S4** The calculated adsorption energy of pentacene on (a) (100) and (b) (010) crystal surface of p-MSB.

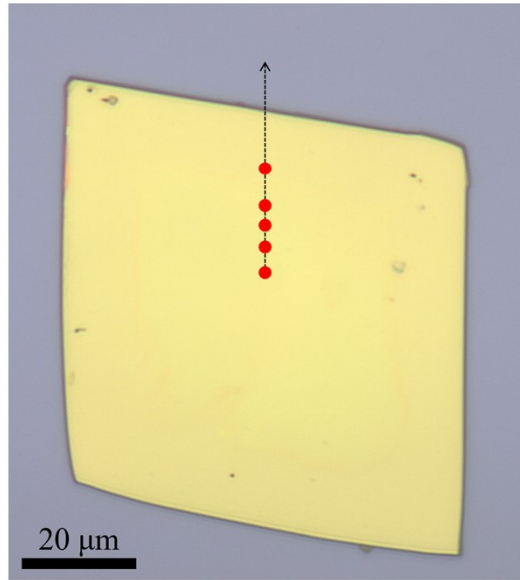

**Fig. S5** Optical image of Pen-doped p-MSB single crystals obtained at growth temperature of 20 °C (1:1 mass ratio), the black arrows indicate the test direction of the optical waveguide, and the red dots indicate the measurement points.

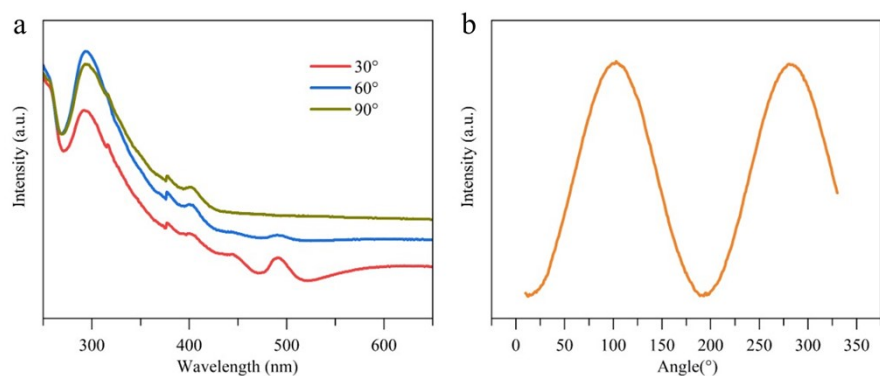

**Fig. S6** Polarization absorption of Pen-doped p-MSB single crystals. (a) Polarization absorption spectra of Pen-doped p-MSB single crystals at 30°, 60° and 90°. (b) Absorption spectra of Pen-doped p-MSB single crystals at different polarization angles.

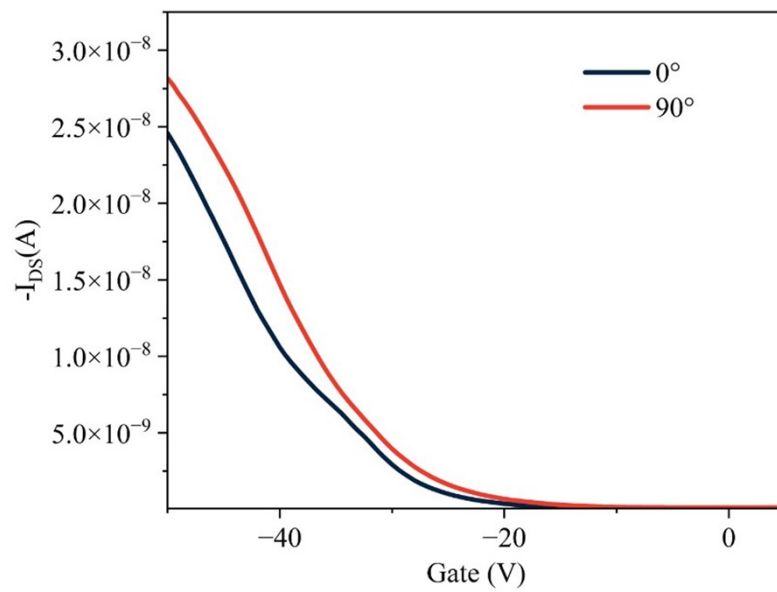

**Fig. S7** The polarization electrical performance of Pen-doped p-MSB single crystals.



**Table S1.** The incident optical power density and the corresponding numbers of paper layers.

| Layers of filter paper | Layers of weighing paper | Optical power density (mW/cm <sup>2</sup> ) |
|------------------------|--------------------------|---------------------------------------------|
| 3                      | 12                       | 0.002                                       |
| 2                      | 12                       | 0.004                                       |
| 1                      | 12                       | 0.013                                       |
| 0                      | 12                       | 0.059                                       |
| 0                      | 9                        | 0.133                                       |
| 0                      | 6                        | 0.322                                       |
| 0                      | 3                        | 0.78                                        |
